# Supplementary material
Source: PubMed Central journal article supplement (PMC2757844)
Supplement: 0901521106_0901521106SI.pdf [file 0901521106_0901521106SI.pdf]

# Supporting Information

Kamil et al. 10.1073/pnas.0901521106

## SI Materials and Methods

**Construction of Recombinant Viruses.** Wild-type and  $\Delta$ DLYC HPV16 E7 coding sequences (CDS) were PCR amplified from plasmids pOZ-C E7 and pOZ E7 DLYC (1), respectively, using primers 97subE7 Fw and 97subE7 Rv (Table S1), which added terminal *Bgl*II and *Bam*HI sites. PCR products were double-digested with *Bgl*II and *Bam*HI and inserted into the cloning plasmid pSP72 (Promega), yielding pE7 and pDLYC. The *I-SceI-AphAI* cassette from pEP-KanaS (2) was then PCR adapted with primers *Ban*II E7 *AphAI* Fw and *Ban*II E7 *AphAI* Rv, and digested with *Ban*II, which is predicted to cut at both ends but also once within the *AphAI* marker sequence. The resulting fragments of 784 and 248 bp were added to ligation reactions with pE7 and pDLYC, which had been opened with *Ban*II, yielding plasmids pE7-TSR and pDLYC-TSR. Plasmids were verified to be free of spurious mutations by DNA sequencing. All DNA oligonucleotides for construction of the two-step Red shuttle vector were custom synthesized and PAGE purified by the manufacturer (Integrated DNA Technologies). *E7-I-SceI-AphAI* and *E7  $\Delta$ DLYC-I-SceI-AphAI* cassettes were excised from pE7-TSR and pDLYC-TSR after *Bgl*II-*Bam*HI double digestion and electroporated into GS1783 *E. coli* (a generous gift of Greg Smith, Northwestern University) harboring AD169rv (3), a BAC clone of HCMV strain AD169. Kanamycin-resistant integrate colonies were obtained and resolved using two-step Red mutagenesis (2) as described previously (4), except *E. coli* strain GS1783, which expresses the *I-SceI* homing endonuclease under arabinose control, was used instead of DY380.

For construction of viruses expressing wild-type or  $\Delta$ DLYC mutant HPV16 E7 proteins from the intergenic region between *US9* and *US10*, primers *Us10\_UL97* promoter Fw and *Us9\_SV40polyA\_E7* Rv (Table S1) were used to PCR amplify sequences spanning from 503 bp upstream of the *UL97* start codon to the *E7* stop codon from *I-SceI-AphAI* integrate BACs that were generated as intermediates during construction of  $\Delta$ 97-E7 and  $\Delta$ 97-DLYC. PCR products were electroporated into GS1783 cells harboring pp28-LUC (a generous gift of Gloria Komazin-Meredith, Harvard Medical School, Boston, MA), an AD169 BAC that encodes in the *US9-US10* intergenic region a

copy of the pp28 (*UL99*) promoter driving expression of a firefly luciferase cassette bearing an SV40 polyadenylation signal from pGL4.13 (Promega, Inc.). pp28-LUC was derived from pBAC/AD169, a close predecessor of pAD/Cre (5) that was generously provided by Dong Yu and Thomas Shenk (Princeton University, Princeton, NJ). Kanamycin-resistant integrate colonies were resolved to yield WT-E7 and WT-DLYC BACs, in which a cassette comprised of a copy of approximately 0.5 kb of sequence immediately upstream of the native *UL97* ORF, a wild-type or a  $\Delta$ DLYC mutant HPV16 E7 CDS, respectively, had replaced the pp28 promoter and luciferase sequences between *US9* and *US10* in pp28-LUC, while leaving the SV40 polyadenylation signal in place (Fig. S4). These BACs were verified by DNA sequencing and agarose gel electrophoresis to be free of unexpected mutations or rearrangements, and were electroporated into HFF to allow for recovery of infectious virus.

**Southern Blotting.** Virus infected cells were collected at the indicated time points and DNA was extracted by standard procedures. One microgram of each DNA sample was digested with *Bam*HI, resolved on a 0.8% agarose gel and transferred to a nylon membrane. Hybridization with a digoxigenin-labeled probe directed against the *UL83* gene and chemiluminescent detection were carried out using the DIG High Prime labeling and detection kit (Roche), as per the manufacturer's instructions.

**RNA Quantification.** To quantify mRNA levels of *TS*, *UMPS*, and *TBP*, RT-qPCR was performed. RNA was extracted from cells using the RNeasy Kit (Qiagen) according to the manufacturer's recommendations and 3  $\mu$ g total RNA was treated with RQ1 RNase-free DNase (Promega) to remove contaminating DNA. cDNA was made using the SuperScript III First-Strand Kit (Invitrogen). qPCR was performed on an ABI 7900HT qPCR machine (Applied Biosystems) using TaqMan Universal PCR Master Mix and TaqMan Gene Expression Assay (Applied Biosystems) primer and probe sets for *TS* (Hs00426591\_m1), *UMPS* (Hs00923717\_m1), and *TBP* (Hs00427620\_m1), as per the manufacturer's recommendations.

1. Huh KW, et al. (2005) Association of the human papillomavirus type 16 E7 oncoprotein with the 600-kDa retinoblastoma protein-associated factor, p600. *Proc Natl Acad Sci USA* 102:11492–11497.
2. Tischer BK, von Einem J, Käufer B, Osterrieder N (2006) Two-step red-mediated recombination for versatile high-efficiency markerless DNA manipulation in *Escherichia coli*. *Biotechniques* 40:191–197.
3. Hobom U, Brune W, Messerle M, Hahn G, Koszinowski UH (2000) Fast screening procedures for random transposon libraries of cloned herpesvirus genomes: Mutational analysis of human cytomegalovirus envelope glycoprotein genes. *J Virol* 74:7720–7729.

4. Kamil JP, Coen DM (2007) Human cytomegalovirus protein kinase UL97 forms a complex with the tegument phosphoprotein pp65. *J Virol* 81:10659–10668.
5. Yu D, Smith GA, Enquist LW, Shenk T (2002) Construction of a self-excisable bacterial artificial chromosome containing the human cytomegalovirus genome and mutagenesis of the diploid TRL/IRL13 gene. *J Virol* 76:2316–2328.

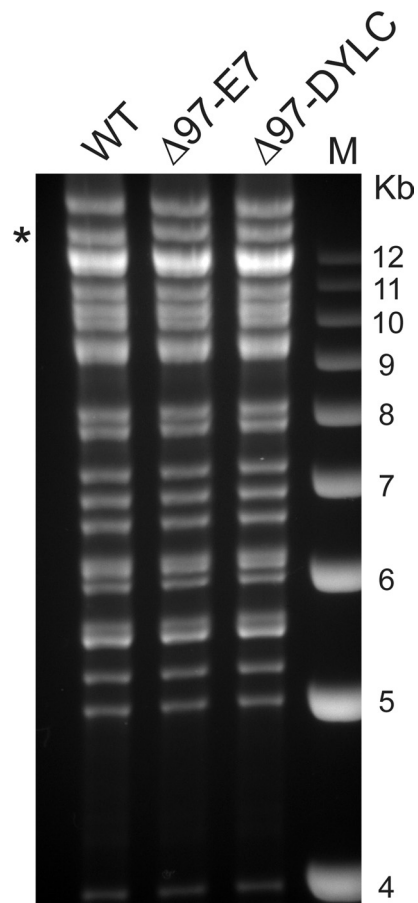

**Fig. S1.** Comparison of recombinant HCMV BAC DNA by agarose gel electrophoresis. BAC DNA (1.5  $\mu$ g) from WT (AD169rv),  $\Delta$ 97-E7 and  $\Delta$ 97-DLYC were each digested with *Bam*HI and loaded onto a 0.7% agarose-0.5 $\times$  Tris Borate EDTA (TBE) gel and electrophoresed overnight at 60 V. The gel was stained with 0.5 $\times$  TBE containing 1  $\mu$ g/mL ethidium bromide and documented using UV illumination using a CCD camera (Bio-Rad). An asterisk marks a restriction fragment of approximately 13.5 kb in the WT lane that is predicted to be approximately 250 bp larger in  $\Delta$ 97-E7 and  $\Delta$ 97-DLYC digests, owing to the loss of a *Bam*HI site in *UL97*. M: Invitrogen 1 kb DNA ladder.



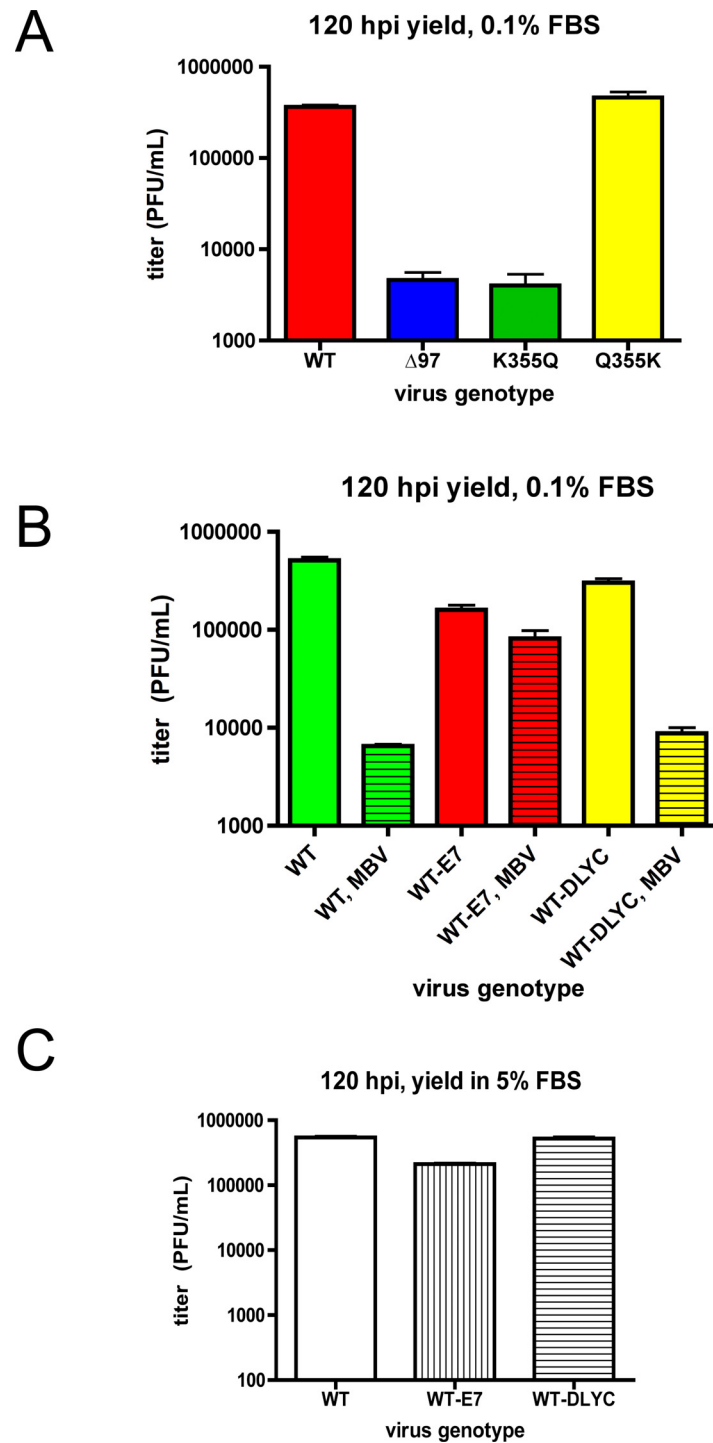

**Fig. S3.** Analysis of viral replication. (A) Quiescent, serum-deprived human fibroblasts were infected at an MOI of 1 PFU/cell with wild-type HCMV (WT), *UL97*-null HCMV ( $\Delta 97$ ), an HCMV expressing a catalytically deficient point mutant of *UL97* (K355Q), or a rescued virus derived from K355Q (Q355K), in which a wild-type *UL97* allele was restored, and compared for yield of infectious virus at 120 hpi. (B) Recombinant HCMVs expressing either wild-type (WT-E7) or  $\Delta$ DLYC mutant (WT-DLYC) forms of HPV16 E7 were compared to parental WT virus (WT) from which they were derived, as above, except in the presence or absence (MBV) of 1  $\mu$ M maribavir. (C) Serum-fed, subconfluent fibroblasts were infected at an MOI of 1 PFU/cell with the same three viruses compared in panel B, above, and monitored for production of infectious virus at 120 hpi. For all three panels, the data represent the average measurement from three replicates per condition, with error bars representing standard deviations.

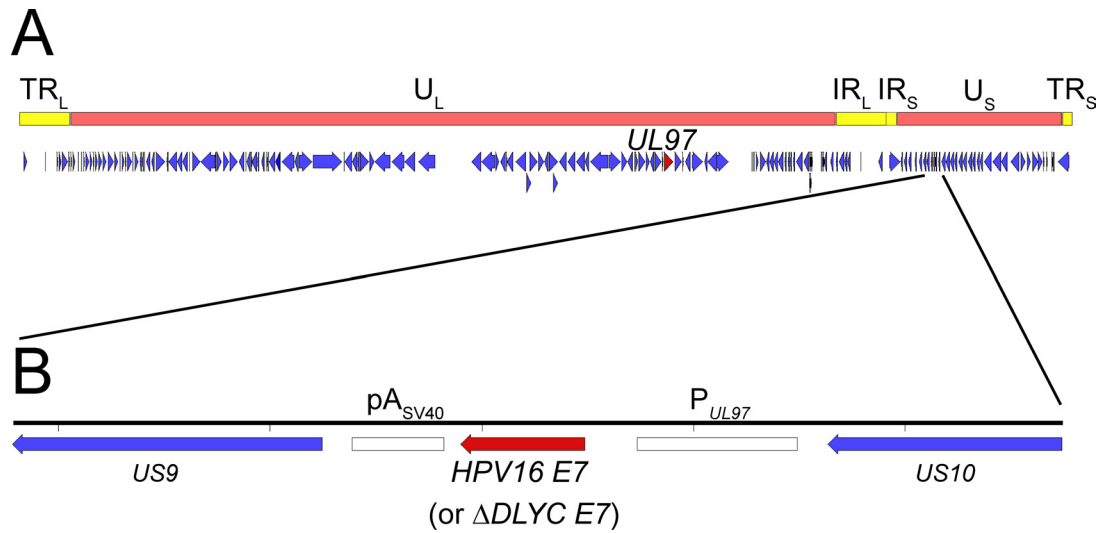

**Fig. S4.** Genome organization of WT-E7 and WT-DLYC viruses that express wild-type or  $\Delta$ DLYC mutant HPV16 E7 in addition to UL97. (A) A schematic of the HCMV strain AD169 genome depicting genome segments ( $TR_L$ ,  $U_L$ ,  $IR_L$ ,  $IR_S$ ,  $U_S$ , and  $TR_S$ ) and, below, viral genes (arrows), as designated by GenBank sequence file NC 001347. Repeat regions are colored in yellow, unique regions in light red,  $UL97$  in dark red. The intergenic region between  $US9$  and  $US10$  where an HPV16 E7 expression cassette was inserted is indicated by lines that transition to the bottom panel. (B) The  $US9$ - $US10$  region is shown in greater detail,  $US9$  and  $US10$  are depicted as blue arrows, and a duplicated sequence identical to a 0.5 kb region immediately upstream of  $UL97$  ( $P_{UL97}$ ) is shown as a white box, as is an SV40 polyA signal ( $pA_{SV40}$ ). Sequences encoding HPV16 E7 are depicted as a red arrow.
